# Supplementary material for: Enhanced performance of surface-modified TiO2 photocatalysts prepared via a visible-light photosynthetic route
Source: Royal Society of Chemistry journal article supplement (doi:10.1039/c2cc34243j), 2012-01-01
Supplement: c2cc34243j.pdf [file c2cc34243j.pdf]

## Enhanced performance of surface-modified TiO<sub>2</sub> photocatalysts prepared *via* a visible-light photosynthetic route

Ayyappan Ramakrishnan, Susann Neubert, Bastian Mei, Lidong Wang, Michal Bledowski, Jennifer Strunk, Martin Muhler and Radim Beranek\*

### Supporting Information

#### Experimental details

##### *Materials*

TiO<sub>2</sub> powder (Hombikat UV 100, anatase, Sachtleben, Germany, specific surface area (BET) ~ 300 m<sup>2</sup>/g, crystallite size < 10 nm), benzene (J.T. Baker), 4-chlorophenol (Fluka), and barium sulfate (Sigma-Aldrich) were used as received.

##### *Preparation of TiO<sub>2</sub>-B-VIS*

1 g of TiO<sub>2</sub> (Hombikat UV 100) was added to 20 ml of benzene in a borosilicate glass reactor and sonicated for 15 min at RT. Then the suspension was irradiated under visible light for 15 h by a 150 W Xenon lamp (LOT Oriel) equipped with a KG-3 (Schott) heat-absorbing filter and a cut-off filter  $\lambda > 455$  nm (GG455, Schott). During the irradiation process the suspension was stirred magnetically and the powder turned slightly brownish. After irradiation the powder was filtered and dried at 80° C for 3h.

##### *Photocatalytic activity tests*

The degradation of 4-chlorophenol and diethyl phthalate was carried out in a cylindrical borosilicate glass reactor attached to an optical train. In the experiment, aqueous solution of the pollutant (25 mL,  $2.5 \times 10^{-4}$  M) and photocatalyst (25 mg, i.e. 1.0 g/l) were added to the glass reactor. The resulting suspension was sonicated for 5 min and then irradiated under visible light for 3 h by a 150 W Xenon lamp (LOT Oriel) equipped with a KG-3 (Schott) heat-absorbing filter (UV + VIS irradiation,  $\lambda > 320$  nm) and a corresponding cut-off filter: GG455 (Schott) cut-off filter for VIS-only irradiation ( $\lambda > 455$  nm); short-wave-pass filter 400FL07 (Schott) for UV-only irradiation ( $\lambda < 400$  nm). The suspension was stirred magnetically.

Samples were taken at regular intervals, collected in the dark, and – after finishing the degradation experiment – filtered through a micropore filter (Sarstedt, 0.20µm) and analyzed by UV-Vis spectroscopy (Cary 50 spectrometer).

Standard deviation ( $\sigma$ ) was calculated from more than three degradation experiments. The error bars were constructed using  $2\sigma$  values (confidence interval of ~95%).

##### *Diffuse reflectance spectroscopy*

UV-Vis diffuse reflectance spectra were recorded on samples diluted in BaSO<sub>4</sub> using a Harrick praying mantis diffuse reflectance accessory mounted in a Perkin Elmer Lambda 650 UV–Vis spectrophotometer. 25 mg of each photocatalyst powder was well ground with 0.5 g of BaSO<sub>4</sub> and spread onto the sampling plate prior to the measurement. The background reflectance of BaSO<sub>4</sub> (reference) was measured before. The Kubelka-Munk function  $F(R_{\infty})$  was calculated as  $F(R_{\infty}) = (1 - R_{\infty})^2 / 2R_{\infty}$ , where  $R_{\infty}$  is diffuse reflectance of the sample relative to the reflectance of a standard according to the Kubelka-Munk theory.

##### *Photocurrent measurements*

For the preparation of the photoelectrode, a suspension containing 200 mg of TiO<sub>2</sub> in 1 ml of ethanol was sonicated for 15 minutes and then smeared onto the ITO glass by doctor blading using a scotch tape as frame and spacer. The electrode was then dried at 100 °C, pressed for 3 minutes at a pressure of 200 kg/cm<sup>2</sup>, and

heated in air at 450 °C for 30 minutes in order to sinter the particles and ensure good electrical contact. The photoelectrochemical setup consisted of a Gamry 600 Reference potentiostat and a three-electrode cell using a platinum counter electrode and a Ag/AgCl reference electrode. The photoelectrodes were pressed against an O-ring of the cell leaving an irradiated area of 0.5 cm<sup>2</sup>. The electrodes were irradiated from the backside (through the ITO glass) by a 150 W Xenon lamp (LOT Oriel) equipped with a KG-3 (Schott) heat-absorbing filter a cut-off filter  $\lambda > 455$  nm (GG455, Schott).

#### *XPS measurements*

XPS was performed in a UHV set-up equipped with a Gammatdata-Scienta SES 2002 analyzer. The base pressure in the measurement chamber was  $5 \times 10^{-10}$  mbar. Monochromatic Al K $\alpha$  (1486.6 eV; 13.5 kV; 37 mA) was used as incident radiation. High resolution region spectra were measured with a pass energy of 200 eV resulting in an effective instrument resolution higher than 0.6 eV. Charging effects were compensated using a flood gun, and binding energies were calibrated based on positioning the main C 1s peak at 285 eV. Measured data were fitted using Shirley-type backgrounds and a combination of Gaussian-Lorentzian functions with the CasaXPS software. Atomic concentration ratios were obtained by determining the integral area of the Gaussian-Lorentzian functions and correcting the values by the specific atomic sensitivity factors proposed by Wagner [S1].

#### *Diffuse Reflectance Infrared Fourier Transform Spectroscopy (DRIFTS)*

Infrared spectra of the powdered samples were measured in diffuse reflectance using a Thermo Nicolet Protégé 460 spectrometer. The samples were diluted with KBr (sample-to-KBr ratio = 1:100), thoroughly ground in a mortar and placed inside a Harrick HVC-DRP-2 *in situ* cell with a Praying Mantis mirror construction. The samples were measured against a KBr background in dry synthetic air without further pretreatment. 500 scans were averaged for each spectrum.

#### *Zeta potential measurements*

The zeta potential pH-titrations of photocatalyst suspensions were carried out using a Zetasizer Nano ZS equipped with He-Ne Laser (633 nm) at 25 °C connected with MPT-2 autotitrator (Malvern). Measurements were performed in range of 2.5 to 11 pH-values at temperature 25 °C by sequential addition of 0.1 M HCl (1 pH Unit/step, in 10 steps). The samples were dispersed in HPLC grade water and then placed into the ultrasonic bath for 5 minutes. For the data analysis, the viscosity and refractive index of pure dispersant at 25 °C were used. The refractive index of samples was assumed to be 2.400.

#### *Quasi-Fermi level measurements*

For heavily doped n-type metal oxides like TiO<sub>2</sub>, the lower conduction band edge,  $E_C$ , practically merges with the quasi-Fermi level for electrons,  $^*E_{Fn}$ , ( $|E_C - ^*E_{Fn}| < 0.1$  V). The values of  $^*E_{Fn}$  were determined by the method of Roy [S2,3]. In short, we recorded the pH dependence of the potential of a Pt electrode immersed in an irradiated (LOT Oriel 150 W Xenon arc lamp; KG3 filter) suspension of a semiconductor in the presence of an electron acceptor with pH-independent reduction potential (MV<sup>2+</sup>; methyl viologen; 1,1'-dimethyl-4,4'-bipyridinium dichloride;  $E_{MV^{2+/+}} = -0.45$  V vs. NHE). The inflection point (pH<sub>0</sub>) of the potential-pH curve (Fig. S4) determines the pH value at which  $^*E_{Fn}$  coincides with  $E_{MV^{2+/+}}$ . Assuming Nernstian shift of band edges the values of  $^*E_{Fn}$  at pH = 7 can be then obtained from equation:  $^*E_{Fn} = E_{MV^{2+/+}} + 0.059$  (pH<sub>0</sub> - 7).

#### **References:**

- S1. Moulder, J. F.; Chastain, J. Handbook of X-ray photoelectron spectroscopy; Perkin-Elmer Corporation: Eden Prairie, Minn, 1992.
- S2. A. M. Roy, G. C. De, N. Sasmal and S. S. Bhattacharyya, *Int. J. Hydrogen Energy*, 1995, **20**, 627-630.
- S3. R. Beranek, *Adv. Phys. Chem.*, 2011, DOI:10.1155/2011/786759.

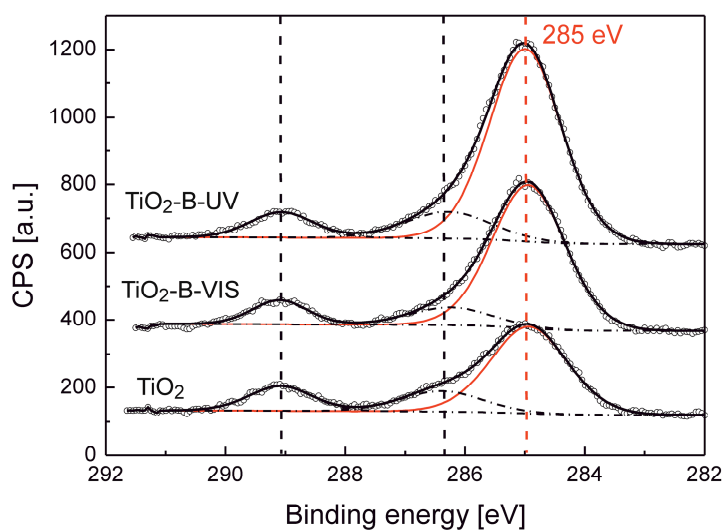

**Figure S1.** High-resolution C1s XP spectra of pristine  $\text{TiO}_2$  and  $\text{TiO}_2\text{-B-VIS}$ . For comparison, an XP spectrum of  $\text{TiO}_2$  modified in benzene under UV light ( $\lambda > 320$  nm) irradiation (2 hours) is shown ( $\text{TiO}_2\text{-B-UV}$ ).

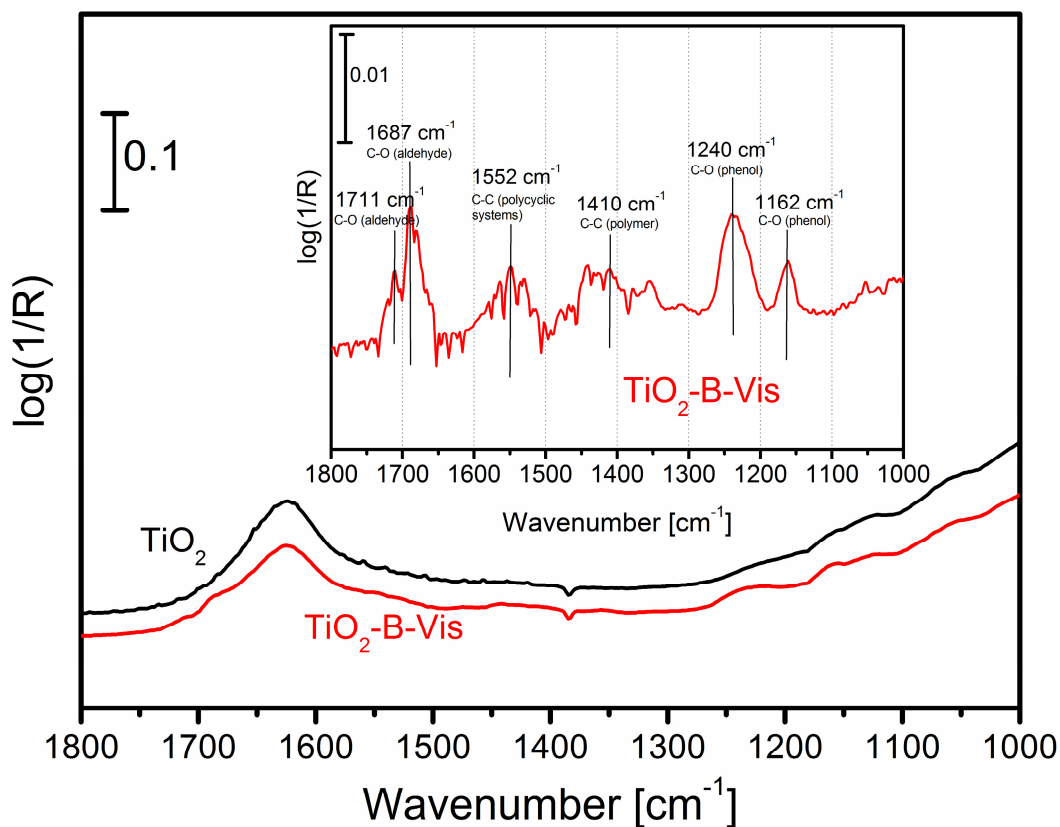

**Figure S2.** Diffuse reflectance infrared spectra of the  $\text{TiO}_2$  and  $\text{TiO}_2\text{-B-VIS}$ . Spectra were obtained from an average of 500 scans and converted into  $\log(1/R)$ . The inset shows a difference spectrum in which the spectrum of the  $\text{TiO}_2$  support has been subtracted from the  $\text{TiO}_2\text{-B-VIS}$  sample spectrum to show more clearly the vibration bands originating from the carbonaceous deposits.

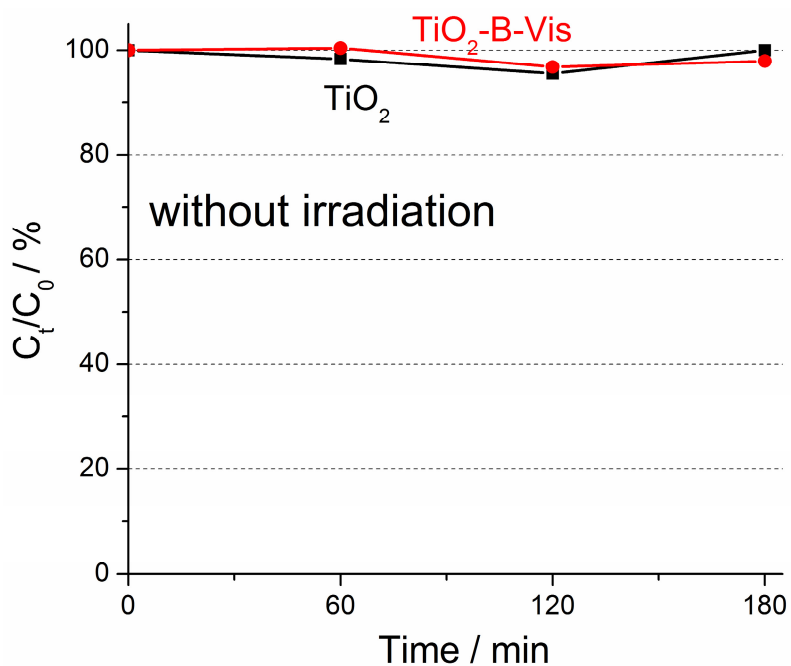

**Figure S3.** 4-CP concentration changes in suspensions of TiO<sub>2</sub> and TiO<sub>2</sub>-B-VIS stirred in the dark.

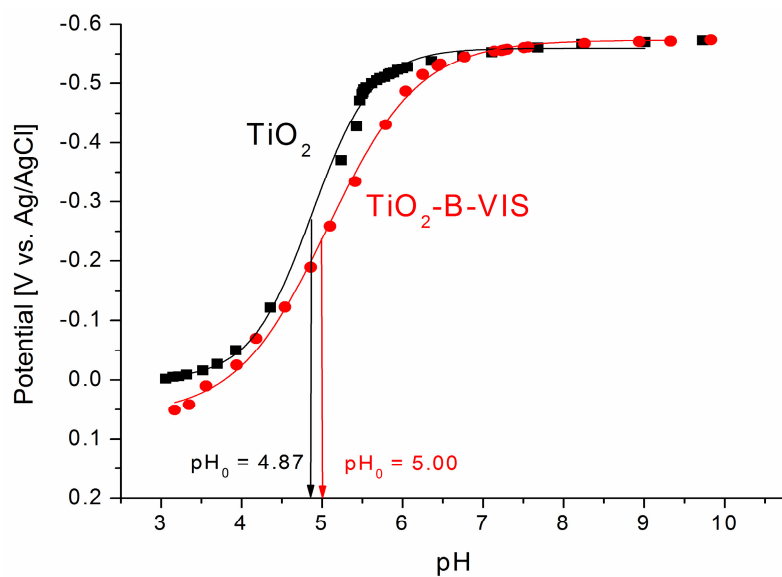

**Figure S4.** pH dependence of the potential of a Pt electrode immersed in an irradiated suspension of pristine TiO<sub>2</sub> and TiO<sub>2</sub>-B-VIS in the presence of (MV)Cl<sub>2</sub>.  $E_{\text{Fn}} = E_{\text{MV}^{2+/+}} + 0.059 (\text{pH}_0 - 7)$ :  $-0.58 \text{ V vs. NHE}$  (TiO<sub>2</sub>);  $-0.57 \text{ V vs. NHE}$  (TiO<sub>2</sub>-B-VIS)

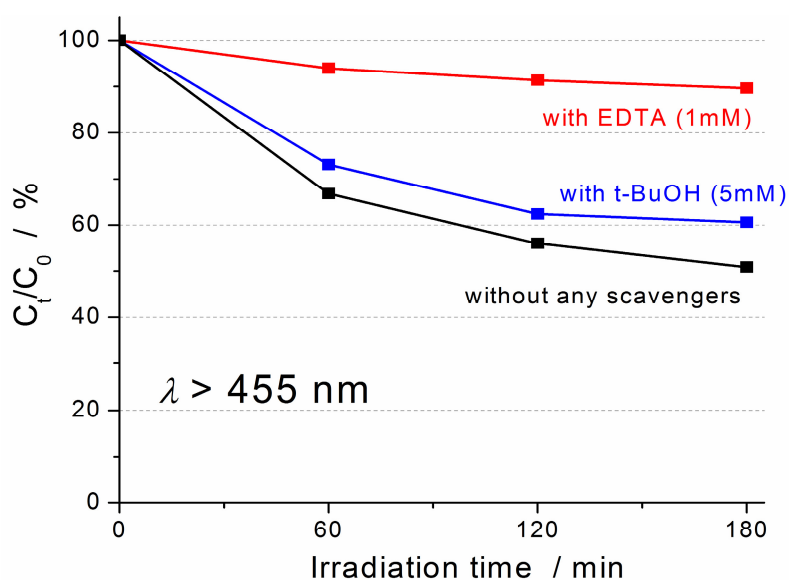

**Figure S5.** Photocatalytic degradation of 4-CP at TiO<sub>2</sub>-B-VIS under visible light irradiation ( $\lambda > 455$  nm) without and with addition of different scavengers.

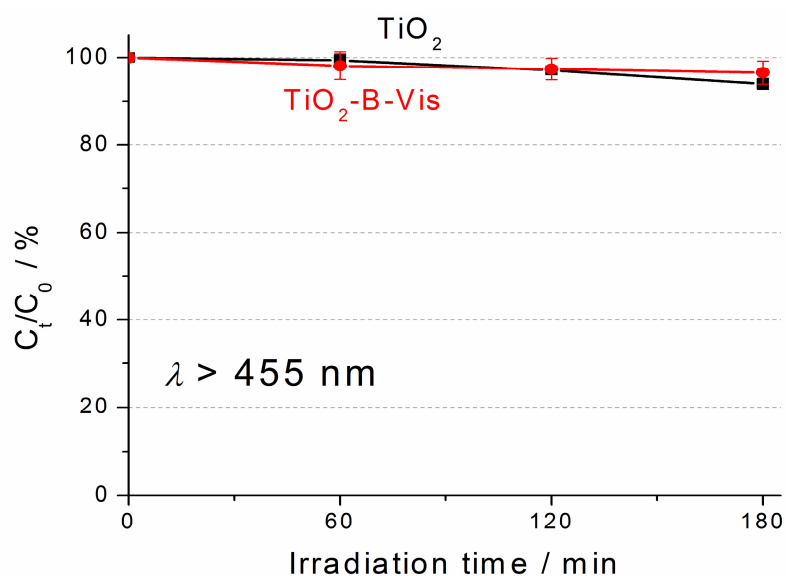

**Figure S6.** Photocatalytic degradation of diethyl phthalate at pristine TiO<sub>2</sub> and TiO<sub>2</sub>-B-VIS under visible light irradiation ( $\lambda > 455$  nm).
